# Supplementary material
Source: publisher site journal article supplement (http://www.spandidos-publications.com/3460/downloadSupplementary)
Supplement: Supplementary file 1 [file downloadSupplementary]

Table SI. MTCO2 staining in rare breast cancer subtypes.

| Subtype                                         | N  | MTCO2 staining |         |             |           |
|-------------------------------------------------|----|----------------|---------|-------------|-----------|
|                                                 |    | Negative, %    | Weak, % | Moderate, % | Strong, % |
| Adenoid-cystic carcinoma                        | 1  | 100.0          | 0.0     | 0.0         | 0.0       |
| Carcinoma with apocrine differentiation         | 13 | 23.1           | 15.4    | 38.5        | 23.1      |
| Carcinoma with medullary features               | 61 | 18.0           | 26.2    | 27.9        | 27.9      |
| Carcinoma with neuroendocrine features          | 3  | 33.3           | 33.3    | 33.3        | 0.0       |
| Carcinoma with signet-ring-cell differentiation | 1  | 0.0            | 0.0     | 0.0         | 100.0     |
| Glycogen-rich clear cell carcinoma              | 12 | 0.0            | 33.3    | 50.0        | 16.7      |
| Metaplastic carcinoma of no special type        | 8  | 0.0            | 37.5    | 37.5        | 25.0      |
| Lipid-rich carcinoma                            | 5  | 0.0            | 20.0    | 80.0        | 0.0       |

MTCO2, mitochondrially encoded cytochrome *c* oxidase II.
